# Supplementary material
Source: PubMed Central journal article supplement (PMC4086355)
Supplement: NIHMS589082-supplement-Supp_Fig_1_and_Supp_Table_1-3.pdf [file NIHMS589082-supplement-Supp_Fig_1_and_Supp_Table_1-3.pdf]

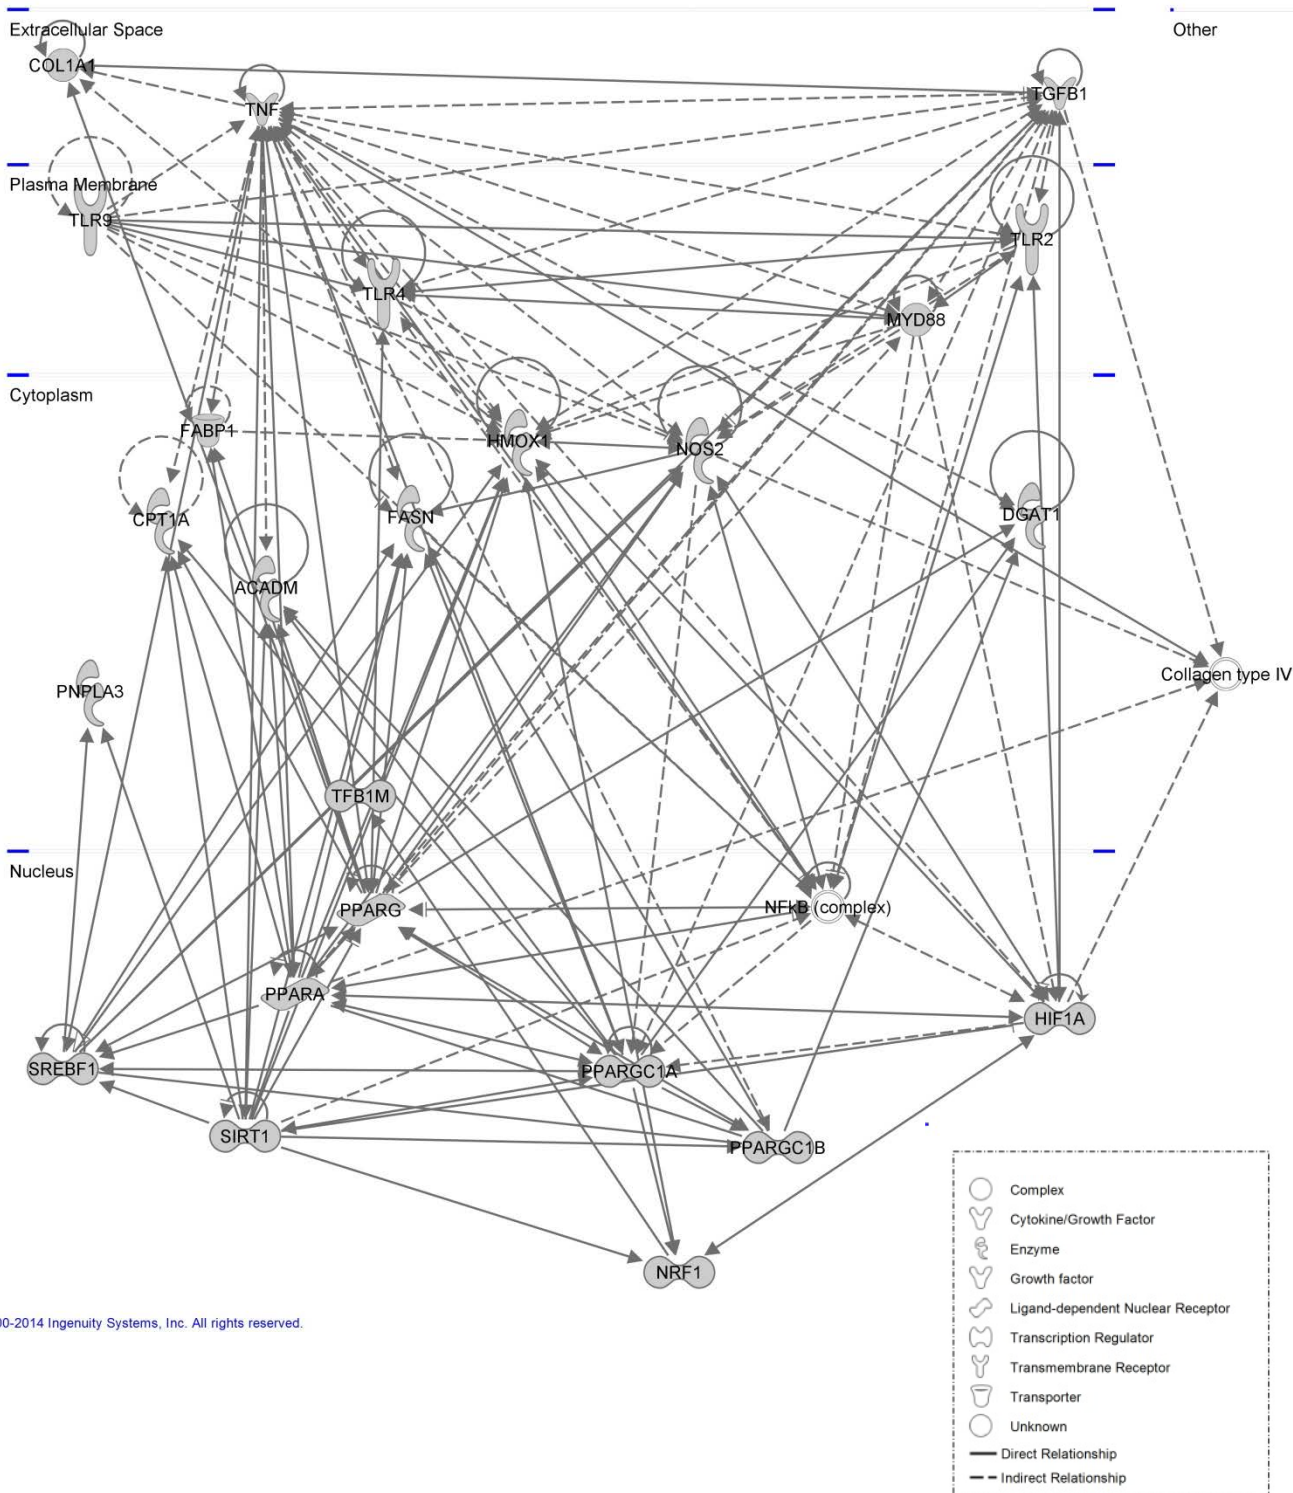

**Supplemental Figure 1. Molecular network of genes from study.** This network analysis shows that all twenty six genes measured in this study (see Figure 3, heatmap) are connected directly (solid line) or indirectly (dashed line). This map illustrates connections among genes involved in lipid metabolism, inflammation, fibrosis, and various mitochondrial regulators. This map was generated by Dr. David Crossman, Department of Genetics, University of Alabama at Birmingham, using Ingenuity Pathway Analysis (Qiagen, Redwood City, CA – [www.ingenuity.com](http://www.ingenuity.com)). The icon legend is included at the bottom of the figure below the network.

**Supplemental Table 1. Results from three-way ANOVA on the effect of diet, genotype, and haplotype on body parameters, liver measurements, serum chemistries, and mitochondrial measurements.**

|                           | Table or Figure | Factor   |              |               | Interaction |        |        |           |
|---------------------------|-----------------|----------|--------------|---------------|-------------|--------|--------|-----------|
|                           |                 | Diet (D) | Genotype (G) | Haplotype (H) | D x G       | D x H  | G x H  | D x G x H |
| Body weight (g)           | Table 1         | <0.001   | <0.001       | 0.332         | <0.001      | 0.554  | 0.686  | 0.485     |
| Liver weight (g)          | Table 1         | <0.001   | <0.001       | 0.672         | <0.001      | 0.968  | 0.356  | 0.044     |
| Liver weight/body weight  | Table 1         | <0.0001  | 0.677        | 0.074         | 0.020       | 0.725  | 0.232  | 0.004     |
| Liver TAG (mg/mg prot)    | Table 1         | 0.0460   | 0.679        | 0.778         | 0.555       | 0.344  | 0.033  | 0.689     |
| Serum TAG (mg/dL)         | Table 1         | <0.001   | <0.001       | 0.009         | 0.009       | 0.212  | 0.271  | 0.167     |
| Serum ALT (IU/L)          | Table 1         | <0.001   | 0.472        | 0.869         | 0.367       | 0.326  | <0.001 | 0.006     |
| Total serum Chol (mg/dL)  | Table 1         | <0.001   | <0.001       | 0.003         | 0.230       | 0.038  | 0.014  | 0.112     |
| Free serum Chol (mg/dL)   | Table 1         | <0.001   | <0.001       | 0.388         | <0.001      | 0.714  | 0.439  | 0.521     |
| Serum Adiponectin (µg/mL) | Table 1         | 0.263    | <0.001       | 0.781         | 0.038       | 0.519  | 0.040  | 0.004     |
| Fibrosis                  | Fig. 2B         | <0.001   | <0.001       | 0.123         | <0.001      | 0.256  | 0.762  | 0.128     |
| Respiration - State 3     | Fig. 4A         | <0.001   | 0.605        | 0.205         | 0.388       | 0.314  | 0.015  | 0.003     |
| Respiration - State 4     | Fig. 4B         | 0.218    | 0.037        | 0.491         | 0.002       | 0.892  | 0.067  | 0.871     |
| Respiration – RCR         | Fig. 4C         | 0.001    | 0.104        | 0.892         | 0.015       | 0.777  | 0.296  | 0.002     |
| Complex I activity        | Fig. 5A         | <0.001   | 0.006        | 0.340         | 0.338       | 0.103  | 0.728  | 0.196     |
| Complex II-III activity   | Fig. 5B         | 0.211    | 0.140        | 0.165         | <0.001      | <0.001 | <0.001 | <0.001    |
| Complex IV activity       | Fig. 5C         | 0.002    | 0.782        | 0.215         | 0.006       | 0.003  | <0.001 | 0.248     |
| Complex V activity        | Fig. 5D         | 0.027    | 0.432        | 0.700         | 0.749       | 0.405  | 0.487  | 0.122     |
| CS activity               | Fig. 5E         | <0.001   | 0.086        | 0.003         | 0.646       | 0.040  | 0.739  | 0.223     |

Values in the table represent p-values from 3-way ANOVA. P-values for diet, genotype, and haplotype indicate their independent (main) effect on the outcome. P-values for interaction indicate interdependency of diet X genotype; diet X haplotype; genotype X haplotype; and diet X genotype X haplotype. “Diet” refers to the comparison of control diet and atherogenic diet. “Genotype” refers to the comparison of nuclear DNA (C57<sup>n</sup> and C3H<sup>n</sup>). “Haplotype” refers to the comparison of mitochondrial DNA (C57<sup>mt</sup> and C3H<sup>mt</sup>). Abbreviations: TAG, triacylglycerol; Chol, cholesterol; ALT, alanine aminotransferase; CS, citrate synthase.

**Supplemental Table 2. Results from three-way ANOVA on the effect of diet, genotype, and haplotype on gene expression.**

|                 | Factor   |              |               | Interaction |        |        |           |
|-----------------|----------|--------------|---------------|-------------|--------|--------|-----------|
|                 | Diet (D) | Genotype (G) | Haplotype (H) | D x G       | D x H  | G x H  | D x G x H |
| <i>ACADM</i>    | <0.001   | 0.323        | 0.463         | 0.621       | 0.998  | 0.043  | 0.110     |
| <i>CPT1A</i>    | <0.001   | 0.646        | 0.275         | 0.044       | 0.980  | 0.546  | 0.550     |
| <i>PPARA</i>    | <0.001   | 0.316        | 0.255         | 0.820       | 0.033  | 0.335  | 0.057     |
| <i>FABP1</i>    | 0.626    | <0.001       | 0.304         | 0.585       | 0.425  | 0.245  | 0.473     |
| <i>PPARG</i>    | 0.102    | <0.001       | 0.838         | 0.207       | 0.645  | 0.930  | 0.700     |
| <i>DGAT1</i>    | <0.001   | 0.600        | 0.300         | 0.200       | 0.063  | 0.152  | 0.451     |
| <i>SREBP1</i>   | <0.001   | 0.065        | 0.498         | 0.119       | 0.233  | 0.919  | 0.279     |
| <i>FASN</i>     | <0.001   | 0.111        | 0.280         | 0.524       | 0.062  | 0.118  | <0.001    |
| <i>PNPLA3</i>   | <0.001   | 0.073        | 0.001         | 0.005       | 0.802  | 0.452  | <0.001    |
| <i>TNFA</i>     | <0.001   | <0.001       | 0.074         | <0.001      | 0.072  | 0.039  | 0.057     |
| <i>NFkB</i>     | <0.001   | <0.001       | 0.884         | <0.001      | 0.588  | 0.729  | 0.535     |
| <i>HMOX1</i>    | <0.001   | 0.002        | 0.433         | 0.005       | 0.435  | 0.195  | 0.111     |
| <i>NOS2</i>     | <0.001   | <0.001       | 0.002         | <0.001      | 0.001  | 0.002  | 0.003     |
| <i>TLR2</i>     | <0.001   | <0.001       | 0.202         | <0.001      | 0.166  | 0.098  | 0.167     |
| <i>TLR4</i>     | <0.001   | <0.001       | 0.210         | <0.001      | 0.152  | 0.138  | 0.221     |
| <i>TLR9</i>     | 0.002    | 0.003        | 0.003         | 0.017       | <0.001 | 0.005  | 0.003     |
| <i>MYD88</i>    | <0.001   | <0.001       | 0.071         | 0.002       | 0.295  | 0.656  | 0.543     |
| <i>COL 1A1</i>  | <0.001   | <0.001       | <0.001        | <0.001      | <0.001 | <0.001 | <0.001    |
| <i>COL 4A1</i>  | <0.001   | 0.002        | 0.468         | 0.002       | 0.534  | 0.641  | 0.440     |
| <i>TGFB1</i>    | <0.001   | <0.001       | 0.765         | 0.001       | 0.969  | 0.465  | 0.950     |
| <i>SIRT1</i>    | <0.001   | 0.048        | 0.913         | 0.063       | 0.541  | 0.929  | 0.235     |
| <i>PPARGC1A</i> | <0.001   | 0.033        | 0.897         | <0.001      | 0.348  | 0.327  | 0.210     |
| <i>PPARGC1B</i> | 0.002    | 0.460        | 0.173         | 0.011       | 0.119  | 0.173  | 0.127     |
| <i>HIF1A</i>    | <0.001   | <0.001       | 0.994         | 0.007       | 0.990  | 0.901  | 0.995     |
| <i>NRF1</i>     | <0.001   | <0.001       | 0.462         | <0.001      | 0.330  | 0.362  | 0.625     |
| <i>TFB1M</i>    | 0.002    | <0.001       | 0.255         | 0.463       | 0.266  | 0.700  | 0.413     |

Values in the table represent p-values from 3-way ANOVA. P-values for diet, genotype, and haplotype indicate their independent (main) effect on gene expression (Figure 3 of the main text). P-values for interaction indicate interdependency of diet X genotype; diet X haplotype; genotype X haplotype; and diet X genotype X haplotype. “Diet” refers to the comparison of control diet and atherogenic diet. “Genotype” refers to the comparison of nuclear DNA (C57<sup>n</sup> and C3H<sup>n</sup>). “Haplotype” refers to the comparison of mitochondrial DNA (C57<sup>mt</sup> and C3H<sup>mt</sup>).

**Supplemental Table 3. Results represent statistically significant p-values for select pair-wise comparisons between treatment groups.**

| Parameter        | 1 vs 2 | 3 vs 4 | 5 vs 6  | 7 vs 8 | 1 vs 3 | 1 vs 5 | 1 vs 7 | 3 vs 5  | 3 vs 7  | 5 vs 7  | 2 vs 4 | 2 vs 6 | 2 vs 8  | 4 vs 6 | 4 vs 8 | 6 vs 8  |
|------------------|--------|--------|---------|--------|--------|--------|--------|---------|---------|---------|--------|--------|---------|--------|--------|---------|
| Body Weight      | 0.0046 | <.0001 | 0.0007  | <.0001 |        |        | 0.0044 | 0.0618  |         | <0.0001 | <.0001 |        | <.0001  | <.0001 |        | <.0001  |
| Liver weight     | 0.0080 | <.0001 | <.0001  | <.0001 |        |        |        | 0.0505  |         |         | <.0001 | 0.0212 | <.0001  | <.0001 |        | <.0001  |
| Liver wt/body wt | <.0001 | 0.0173 | <.0001  | <.0001 |        |        |        |         | 0.0886  |         |        | 0.0007 |         | <.0001 | 0.0877 | 0.0248  |
| Liver TAG        | 0.093  |        |         | 0.0004 |        |        | 0.054  | 0.063   | 0.023   | 0.006   |        |        |         |        | 0.032  |         |
| Serum TAG        |        | <.0001 |         | <.0001 | <.0001 |        | <.0001 | <0.0001 | 0.0788  | <0.0001 | 0.0161 |        | 0.0001  | 0.0042 | 0.0569 | <.0001  |
| Total Serum Chol | 0.0009 |        | 0.0120  | <.0001 | 0.0004 |        | <.0001 | 0.0021  |         | <.0001  | 0.0560 |        | <0.0001 | 0.0320 | 0.0160 | <0.0001 |
| Free Serum Chol  | <.0001 |        | <.0001  |        | 0.0015 |        | <.0001 | 0.0018  |         | <0.0001 |        |        |         |        |        |         |
| Serum Adipon     |        | 0.0227 | 0.0105  |        | 0.0002 | 0.0281 |        | <0.0001 | 0.0061  | 0.0006  |        |        | 0.0241  |        |        | 0.0246  |
| Serum ALT        | 0.0381 |        | 0.0001  | <.0001 |        |        |        |         |         |         |        | 0.0190 | 0.0069  | 0.0005 | 0.0002 |         |
| Fibrosis         | <.0001 |        | 0.0013  |        |        |        |        |         |         |         | <.0001 |        | <.0001  | <.0001 |        | <.0001  |
| State 3          |        |        | 0.0025  | <.0001 |        |        | 0.0066 | 0.0306  | 0.0017  |         |        |        |         | 0.0025 | 0.0007 |         |
| State 4          | 0.0078 |        | 0.0509  |        |        |        |        |         |         |         | 0.0004 |        | 0.0319  | 0.0509 |        | 0.0105  |
| RCR              |        |        | <.0001  | 0.0273 |        | 0.0422 | 0.0652 | 0.0380  | 0.0571  |         | 0.0105 |        |         | 0.0005 |        | 0.0158  |
| Complex I        | 0.0034 | 0.0061 |         | 0.0025 | 0.0291 |        |        |         |         |         |        |        |         | 0.0062 |        | 0.0120  |
| Complex II-III   |        | <.0001 | 0.0539  | 0.0017 | <.0001 | 0.0699 | 0.0191 | <0.0001 | <0.0001 |         | 0.0025 |        |         | 0.0217 | 0.0032 |         |
| Complex IV       | 0.0008 | 0.0932 | 0.0129  | 0.0206 |        |        |        | 0.0013  | 0.0038  |         | <.0001 | 0.0004 | 0.0015  |        |        |         |
| Complex V        |        |        |         | 0.0111 |        |        |        |         |         |         |        |        |         |        |        |         |
| CS               | 0.0002 | 0.0801 |         | 0.0014 |        |        |        |         |         |         | 0.0001 | 0.0003 | 0.0438  |        | 0.0531 |         |
| ACADM            | 0.0008 | 0.0005 | 0.0392  | 0.0129 |        | 0.0294 | 0.0379 |         |         |         |        |        |         |        |        |         |
| CPT1             | <.0001 | 0.0018 | <.0001  | 0.0004 |        |        |        |         |         |         |        |        |         |        |        |         |
| PPARA            | 0.0049 |        | 0.0093  | <.0001 |        |        |        |         |         |         |        |        | 0.0710  |        | 0.0038 | 0.0450  |
| FABP1            |        |        |         |        | 0.0021 |        | 0.0018 | 0.0028  |         | 0.0023  | 0.0499 |        | 0.0006  | 0.0532 | 0.0658 | 0.0006  |
| PPARG            |        |        | 0.0569  |        | 0.0009 |        | 0.0009 | 0.0017  |         | 0.0016  | <.0001 |        | <.0001  | <.0001 |        | <.0010  |
| DGAT1            | <.0001 | 0.0130 | 0.0035  | 0.0007 |        |        |        |         |         |         |        | 0.0147 |         |        |        |         |
| SREBP1           | <.0001 | 0.0002 | <.0001  | <.0001 | 0.0163 |        |        | 0.0582  |         |         |        |        |         |        |        |         |
| FASN             | 0.0979 |        | 0.0003  | <.0001 | 0.0137 |        | 0.0853 | 0.0005  | 0.0004  |         |        |        | 0.0802  |        | 0.0924 |         |
| PNPLA3           |        | 0.0804 | <0.0001 | 0.0013 | 0.0004 |        |        | <0.0001 | 0.0001  |         |        | 0.0002 | 0.0793  | 0.0076 |        | 0.0350  |
| TNFA             | <.0001 | 0.0500 | 0.0085  | 0.0280 |        |        |        |         |         |         | <.0001 | 0.0005 | <.0001  | 0.0158 |        | 0.0004  |
| NfκB             | <.0001 |        | <.0001  | <.0001 |        |        |        |         |         |         | 0.0003 |        | 0.0003  | 0.0003 |        | 0.0040  |
| HMOX1            | <.0001 | 0.0070 | 0.004   | 0.0932 |        |        |        |         |         |         | 0.0003 | 0.0283 | <.0001  | 0.0724 |        | 0.0161  |
| NOS2             | <.0001 | 0.0002 | <.0001  | 0.0892 |        |        |        |         |         |         | <.0001 | <.0001 | <.0001  | <.0001 |        | 0.0360  |

|                 |        |        |        |        |        |  |        |        |        |        |        |        |        |        |        |        |
|-----------------|--------|--------|--------|--------|--------|--|--------|--------|--------|--------|--------|--------|--------|--------|--------|--------|
| <i>TLR2</i>     | <.0001 |        | 0.0035 |        |        |  |        |        |        |        | <.0001 | 0.0522 | 0.0002 | 0.0026 |        | 0.0146 |
| <i>TLR4</i>     | <.0001 | 0.0160 | 0.0011 | 0.0730 |        |  |        |        |        |        | <.0001 | 0.0093 | <.0001 | 0.0131 |        | 0.0128 |
| <i>TLR9</i>     | <.0001 |        |        | 0.0810 |        |  |        |        |        |        | <.0001 | <.0001 | <.0001 |        |        |        |
| <i>MYD88</i>    | <.0001 |        | 0.0006 |        |        |  |        |        |        |        | <.0001 | 0.0552 | 0.0002 | 0.0026 |        | 0.0237 |
| <i>Col 1a</i>   | <.0001 | 0.0006 | <.0001 | 0.0784 |        |  |        |        |        |        | <.0001 | <.0001 | <.0001 | <.0001 |        | <.0001 |
| <i>Col4A1</i>   | 0.0008 | 0.0485 | <.0001 | 0.0012 |        |  |        |        |        |        | 0.0082 |        | 0.0072 | 0.0003 |        | 0.0003 |
| <i>TGFB1</i>    | 0.0001 |        | 0.0004 | 0.0072 |        |  |        |        |        |        | 0.0006 |        | 0.0001 | 0.0011 |        | 0.0003 |
| <i>SIRT1</i>    | 0.0008 |        | 0.0004 |        |        |  |        |        |        |        | 0.0665 |        | 0.0213 | 0.0650 |        |        |
| <i>PPARGC1A</i> | <.0001 |        | 0.0002 |        |        |  |        |        | 0.0883 | 0.0049 |        |        | <.0001 | 0.0267 |        | 0.0006 |
| <i>PPARGC1B</i> | 0.0044 |        | 0.0048 | 0.0632 |        |  |        |        |        | 0.0028 |        |        | 0.7893 | 0.0030 | 0.0054 |        |
| <i>HIF1A</i>    | 0.0008 |        | 0.0007 |        |        |  |        |        |        | 0.0018 |        |        | 0.0015 | 0.002  |        | 0.0017 |
| <i>NRF1</i>     | <.0001 | 0.0170 | <.0001 | 0.0084 |        |  |        |        |        |        | <.0001 |        | <.0001 | 0.0001 |        | 0.0006 |
| <i>TFB1M</i>    | 0.0323 |        | 0.0509 | 0.0268 | 0.0011 |  | 0.0047 | 0.0002 |        | 0.0010 | 0.0805 |        | 0.0038 | 0.0110 |        | 0.0004 |

Results in black font are p-values ( $p < 0.05$ ) for pair wise comparisons between treatment groups. Gray font p-values just missed statistical significance. A blank space indicate  $P \geq 0.10$

1 vs. 2= WT C57 (C57<sup>n</sup>:C57<sup>mt</sup>)-Control vs. WT C57 (C57<sup>n</sup>:C57<sup>mt</sup>)-Atherogenic

3 vs. 4= WT C3H (C3H<sup>n</sup>:C3H<sup>mt</sup>)-Control vs. WT C3H (C3H<sup>n</sup>:C3H<sup>mt</sup>)-Atherogenic

5 vs. 6= MNX C57<sup>n</sup> (C57<sup>n</sup>:C3H<sup>mt</sup>)-Control vs. MNX C57<sup>n</sup> (C57<sup>n</sup>:C3H<sup>mt</sup>)-Atherogenic

7 vs. 8= MNX C3H<sup>n</sup> (C3H<sup>n</sup>:C57<sup>mt</sup>)-Control vs. MNX C3H<sup>n</sup> (C3H<sup>n</sup>:C57<sup>mt</sup>)-Atherogenic

1 vs. 3= WT C57 (C57<sup>n</sup>:C57<sup>mt</sup>)-Control vs. WT C3H (C3H<sup>n</sup>:C3H<sup>mt</sup>)-Control

1 vs. 5= WT C57 (C57<sup>n</sup>:C57<sup>mt</sup>)-Control vs. MNX C57<sup>n</sup> (C57<sup>n</sup>:C3H<sup>mt</sup>)-Control

1 vs. 7= WT C57 (C57<sup>n</sup>:C57<sup>mt</sup>)-Control vs. MNX C3H<sup>n</sup> (C3H<sup>n</sup>:C57<sup>mt</sup>)-Control

3 vs. 5= WT C3H (C3H<sup>n</sup>:C3H<sup>mt</sup>)-Control vs. MNX C57<sup>n</sup> (C57<sup>n</sup>:C3H<sup>mt</sup>)-Control

3 vs. 7= WT C3H (C3H<sup>n</sup>:C3H<sup>mt</sup>)-Control vs. MNX C3H<sup>n</sup> (C3H<sup>n</sup>:C57<sup>mt</sup>)-Control

5 vs. 7= MNX C57<sup>n</sup> (C57<sup>n</sup>:C3H<sup>mt</sup>)-Control vs. MNX C3H<sup>n</sup> (C3H<sup>n</sup>:C57<sup>mt</sup>)-Control

2 vs. 4= WT C57 (C57<sup>n</sup>:C57<sup>mt</sup>)-Atherogenic vs. WT C3H (C3H<sup>n</sup>:C3H<sup>mt</sup>)-Atherogenic

2 vs. 6= WT C57 (C57<sup>n</sup>:C57<sup>mt</sup>)-Atherogenic vs. MNX C57<sup>n</sup> (C57<sup>n</sup>:C3H<sup>mt</sup>)-Atherogenic

2 vs. 8= WT C57 (C57<sup>n</sup>:C57<sup>mt</sup>)-Atherogenic vs. MNX C3H<sup>n</sup> (C3H<sup>n</sup>:C57<sup>mt</sup>)-Atherogenic

4 vs. 6= WT C3H (C3H<sup>n</sup>:C3H<sup>mt</sup>)-Atherogenic vs. MNX C57<sup>n</sup> (C57<sup>n</sup>:C3H<sup>mt</sup>)-Atherogenic

4 vs. 8= WT C3H (C3H<sup>n</sup>:C3H<sup>mt</sup>)-Atherogenic vs. MNX C3H<sup>n</sup> (C3H<sup>n</sup>:C57<sup>mt</sup>)-Atherogenic
